# Supplementary material for: TERMINAL FLOWER 1-FD complex target genes and competition with FLOWERING LOCUS T
Source: PubMed Central journal article supplement (PMC7550357; doi:10.1038/s41467-020-18782-1), 2020-10-12
Supplement: 41467_2020_18782_MOESM3_ESM.pdf [file 41467_2020_18782_MOESM3_ESM.pdf]

## **Descriptions of Additional Supplementary Files**

**Supplementary Data 1** TFL1-FD bound and regulated genes
