# Supplementary material for: TERMINAL FLOWER 1-FD complex target genes and competition with FLOWERING LOCUS T
Source: PubMed Central journal article supplement (PMC7550357; doi:10.1038/s41467-020-18782-1), 2020-10-12
Supplement: 41467_2020_18782_MOESM5_ESM.pdf [file 41467_2020_18782_MOESM5_ESM.pdf]

## Reporting Summary

Nature Research wishes to improve the reproducibility of the work that we publish. This form provides structure for consistency and transparency in reporting. For further information on Nature Research policies, see [Authors & Referees](#) and the [Editorial Policy Checklist](#).

### Statistics

For all statistical analyses, confirm that the following items are present in the figure legend, table legend, main text, or Methods section.

n/a Confirmed

- |                                     |                                     |                                                                                                                                                                                                                                                            |
|-------------------------------------|-------------------------------------|------------------------------------------------------------------------------------------------------------------------------------------------------------------------------------------------------------------------------------------------------------|
| <input type="checkbox"/>            | <input checked="" type="checkbox"/> | The exact sample size ( $n$ ) for each experimental group/condition, given as a discrete number and unit of measurement                                                                                                                                    |
| <input type="checkbox"/>            | <input checked="" type="checkbox"/> | A statement on whether measurements were taken from distinct samples or whether the same sample was measured repeatedly                                                                                                                                    |
| <input type="checkbox"/>            | <input checked="" type="checkbox"/> | The statistical test(s) used AND whether they are one- or two-sided<br><i>Only common tests should be described solely by name; describe more complex techniques in the Methods section.</i>                                                               |
| <input checked="" type="checkbox"/> | <input type="checkbox"/>            | A description of all covariates tested                                                                                                                                                                                                                     |
| <input type="checkbox"/>            | <input checked="" type="checkbox"/> | A description of any assumptions or corrections, such as tests of normality and adjustment for multiple comparisons                                                                                                                                        |
| <input type="checkbox"/>            | <input checked="" type="checkbox"/> | A full description of the statistical parameters including central tendency (e.g. means) or other basic estimates (e.g. regression coefficient) AND variation (e.g. standard deviation) or associated estimates of uncertainty (e.g. confidence intervals) |
| <input type="checkbox"/>            | <input checked="" type="checkbox"/> | For null hypothesis testing, the test statistic (e.g. $F$ , $t$ , $r$ ) with confidence intervals, effect sizes, degrees of freedom and $P$ value noted<br><i>Give <math>P</math> values as exact values whenever suitable.</i>                            |
| <input checked="" type="checkbox"/> | <input type="checkbox"/>            | For Bayesian analysis, information on the choice of priors and Markov chain Monte Carlo settings                                                                                                                                                           |
| <input checked="" type="checkbox"/> | <input type="checkbox"/>            | For hierarchical and complex designs, identification of the appropriate level for tests and full reporting of outcomes                                                                                                                                     |
| <input type="checkbox"/>            | <input checked="" type="checkbox"/> | Estimates of effect sizes (e.g. Cohen's $d$ , Pearson's $r$ ), indicating how they were calculated                                                                                                                                                         |

*Our web collection on [statistics for biologists](#) contains articles on many of the points above.*

### Software and code

Policy information about [availability of computer code](#)

Data collection

All software used (including the version and parameter, when not default) is indicated in the Methods section. A github link to code is provided.

Data analysis

All software used (including the version and parameter, when not default) is indicated in the Methods section. A github link to code is provided.

For manuscripts utilizing custom algorithms or software that are central to the research but not yet described in published literature, software must be made available to editors/reviewers. We strongly encourage code deposition in a community repository (e.g. GitHub). See the Nature Research [guidelines for submitting code & software](#) for further information.

### Data

Policy information about [availability of data](#)

All manuscripts must include a [data availability statement](#). This statement should provide the following information, where applicable:

- Accession codes, unique identifiers, or web links for publicly available datasets
- A list of figures that have associated raw data
- A description of any restrictions on data availability

Accession code for genomic datasets is provided

### Field-specific reporting

Please select the one below that is the best fit for your research. If you are not sure, read the appropriate sections before making your selection.

- Life sciences       Behavioural & social sciences       Ecological, evolutionary & environmental sciences

## Life sciences study design

All studies must disclose on these points even when the disclosure is negative.

|                 |                                                                                                                                                                                                                                                                              |
|-----------------|------------------------------------------------------------------------------------------------------------------------------------------------------------------------------------------------------------------------------------------------------------------------------|
| Sample size     | The sample size was chosen on the basis of prior studies that showed significant effects with similar samples sizes (for example see Winter et al., Developmental Cell 2011, Xiao et al., Nature Genetics 2017 and Yamaguchi N. et al., Science 2015, Chung et al., NC 2020) |
| Data exclusions | No data was excluded from the analysis                                                                                                                                                                                                                                       |
| Replication     | All attempts at replication were successful                                                                                                                                                                                                                                  |
| Randomization   | Sample allocation into groups was random                                                                                                                                                                                                                                     |
| Blinding        | The investigators were not blinded                                                                                                                                                                                                                                           |

## Reporting for specific materials, systems and methods

We require information from authors about some types of materials, experimental systems and methods used in many studies. Here, indicate whether each material, system or method listed is relevant to your study. If you are not sure if a list item applies to your research, read the appropriate section before selecting a response.

### Materials & experimental systems

| n/a                                 | Involvement in the study                             |
|-------------------------------------|------------------------------------------------------|
| <input type="checkbox"/>            | <input checked="" type="checkbox"/> Antibodies       |
| <input checked="" type="checkbox"/> | <input type="checkbox"/> Eukaryotic cell lines       |
| <input checked="" type="checkbox"/> | <input type="checkbox"/> Palaeontology               |
| <input checked="" type="checkbox"/> | <input type="checkbox"/> Animals and other organisms |
| <input checked="" type="checkbox"/> | <input type="checkbox"/> Human research participants |
| <input checked="" type="checkbox"/> | <input type="checkbox"/> Clinical data               |

### Methods

| n/a                                 | Involvement in the study                        |
|-------------------------------------|-------------------------------------------------|
| <input type="checkbox"/>            | <input checked="" type="checkbox"/> ChIP-seq    |
| <input checked="" type="checkbox"/> | <input type="checkbox"/> Flow cytometry         |
| <input checked="" type="checkbox"/> | <input type="checkbox"/> MRI-based neuroimaging |

### Antibodies

|                 |                                                                                                                             |
|-----------------|-----------------------------------------------------------------------------------------------------------------------------|
| Antibodies used | anti-GFP antibody (Thermo Fisher Scientific, A-11122; 1:200 dilution)<br>anti-GUS antibody (Abcam, ab50148; 1:200 dilution) |
| Validation      | The antibodies were validated by the suppliers.                                                                             |

### ChIP-seq

#### Data deposition

- Confirm that both raw and final processed data have been deposited in a public database such as [GEO](https://www.ncbi.nlm.nih.gov/geo/).
- Confirm that you have deposited or provided access to graph files (e.g. BED files) for the called peaks.

Data access links  
May remain private before publication. *For "Initial submission" or "Revised version" documents, provide reviewer access links. For your "Final submission" document, provide a link to the deposited data.*

|                              |                                                                                                                                                                                                                                                                                                                                                                                                                                                                                                                                        |
|------------------------------|----------------------------------------------------------------------------------------------------------------------------------------------------------------------------------------------------------------------------------------------------------------------------------------------------------------------------------------------------------------------------------------------------------------------------------------------------------------------------------------------------------------------------------------|
| Files in database submission | <p>Deposition at GEO: GSE141894</p> <p>ChIPseq</p> <p>FD ChIP: 2 replicates</p> <p>TFL1ChIP : 4 replicates</p> <p>TFL1 ChIP in fd mutant: 2 replicates</p> <p>Control ChIP (no antigen) wild type: 2 replicates</p> <p>Control ChIP (no antigen) fd mutant: 2 replicates</p> <p>Input : 4 replicates in total</p> <p>RNA-seq</p> <p>ft mutant no treatment: 3 replicates</p> <p>ft mutant FRP photoperiod shift: 3 replicates</p> <p>tfl1 mutant no treatment: 3 replicates</p> <p>tfl1 mutant FRP photoperiod shift: 3 replicates</p> |
|------------------------------|----------------------------------------------------------------------------------------------------------------------------------------------------------------------------------------------------------------------------------------------------------------------------------------------------------------------------------------------------------------------------------------------------------------------------------------------------------------------------------------------------------------------------------------|

wild type no treatment: 3 replicates  
wild type FRP photoperiod shift: 3 replicates

Genome browser session  
(e.g. [UCSC](#))

*Provide a link to an anonymized genome browser session for "Initial submission" and "Revised version" documents only, to enable peer review. Write "no longer applicable" for "Final submission" documents.*

## Methodology

Replicates

Replicates agreed well, data provided in the supplement

Sequencing depth

| Experiment                  | Total number of reads | Reads with MAPQ $\geq$ 30 | Length of reads | Paired or single end |
|-----------------------------|-----------------------|---------------------------|-----------------|----------------------|
| gFD-GUS Rep1 ChIP-Seq       | 25,695,641            | 9,212,549                 | 75              | SINGLE               |
| gFD-GUS Rep2 ChIP-Seq       | 26,131,970            | 10,185,838                | 75              | SINGLE               |
| gTFL1-GFP A Rep1 ChIP-Seq   | 21,669,805            | 10,636,053                | 75              | SINGLE               |
| gTFL1-GFP A Rep2 ChIP-Seq   | 20,580,773            | 10,067,141                | 75              | SINGLE               |
| gTFL1-GFP B Rep1 ChIP-Seq   | 22,388,892            | 11,719,076                | 75              | SINGLE               |
| gTFL1-GFP B Rep2 ChIP-Seq   | 19,983,625            | 11,284,465                | 75              | SINGLE               |
| fd_gTFL1-GFP Rep1 ChIP-Seq  | 20,743,880            | 8,775,382                 | 75              | SINGLE               |
| fd_gTFL1-GFP Rep2 ChIP-Seq  | 27,505,136            | 12,369,123                | 75              | SINGLE               |
| Control Rep1 ChIP-Seq       | 21,687,867            | 3,946,947                 | 75              | SINGLE               |
| Control Rep2 ChIP-Seq       | 23,161,566            | 4,647,368                 | 75              | SINGLE               |
| Control for fd_gTFL1-GFP R1 | 30,542,333            | 8,402,421                 | 75              | SINGLE               |
| Control for fd_gTFL1-GFP R2 | 35,808,196            | 9,997,036                 | 75              | SINGLE               |
| TFL1 Input Rep1 ChIP-Seq    | 40,751,281            | 26,558,556                | 75              | SINGLE               |
| TFL1 Input Rep2 ChIP-Seq    | 40,570,788            | 27,277,901                | 75              | SINGLE               |
| TFL1B input ChIP-Seq        | 48,142,717            | 16,067,082                | 75              | SINGLE               |
| Control input ChIP-Seq      | 44,701,929            | 15,510,704                | 75              | SINGLE               |

Antibodies

anti-GFP antibody (Thermo Fisher Scientific, A-11122; 1:200 dilution)  
anti-GUS antibody (Abcam, ab50148; 1:200 dilution)  
Antibodies were validated by the supplier and by control ChIP reactions using plants lacking the antigene.

Peak calling parameters

Peak calling is described in the Methods

Data quality

Peak attributes are described in the Methods

Software

Software used is described in the Methods
